# Supplementary material for: Beauty, elegance, grace, and sexiness compared
Source: PubMed Central journal article supplement (PMC6588248; doi:10.1371/journal.pone.0218728), 2019-06-21

# Aspects of build (sorted by mean of men & women)

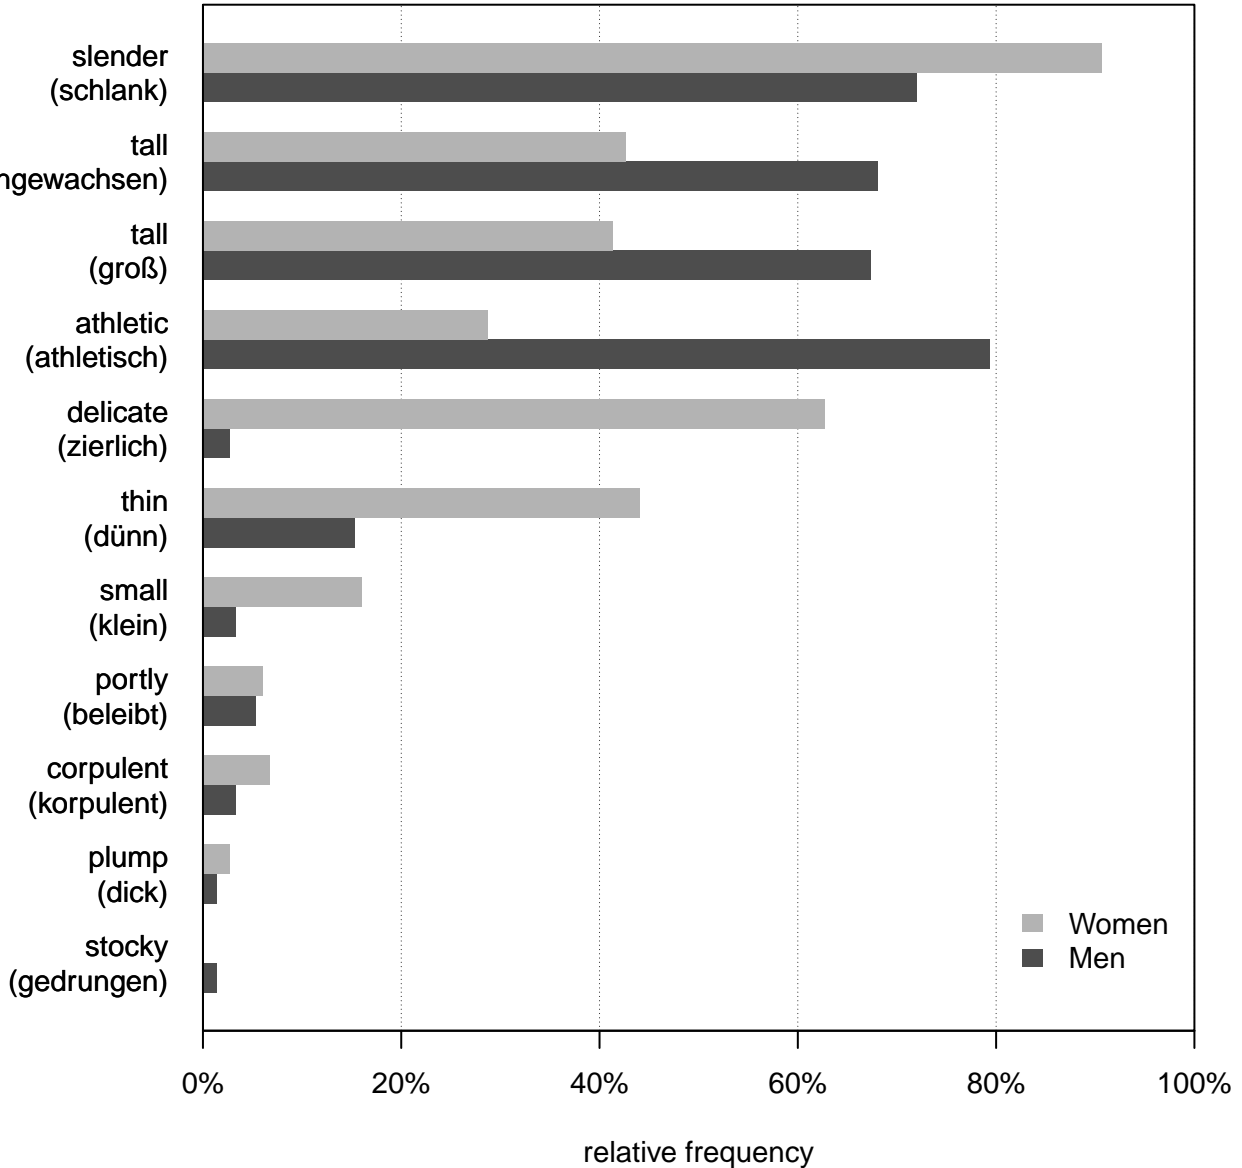

Supplement: pone.0218728.s010.pdf [file pone.0218728.s010.pdf]
