# Supplementary material for: Beauty, elegance, grace, and sexiness compared
Source: PubMed Central journal article supplement (PMC6588248; doi:10.1371/journal.pone.0218728), 2019-06-21
Supplement: pone.0218728.s011.pdf [file pone.0218728.s011.pdf]

body size

small

medium

tall

Women

Men

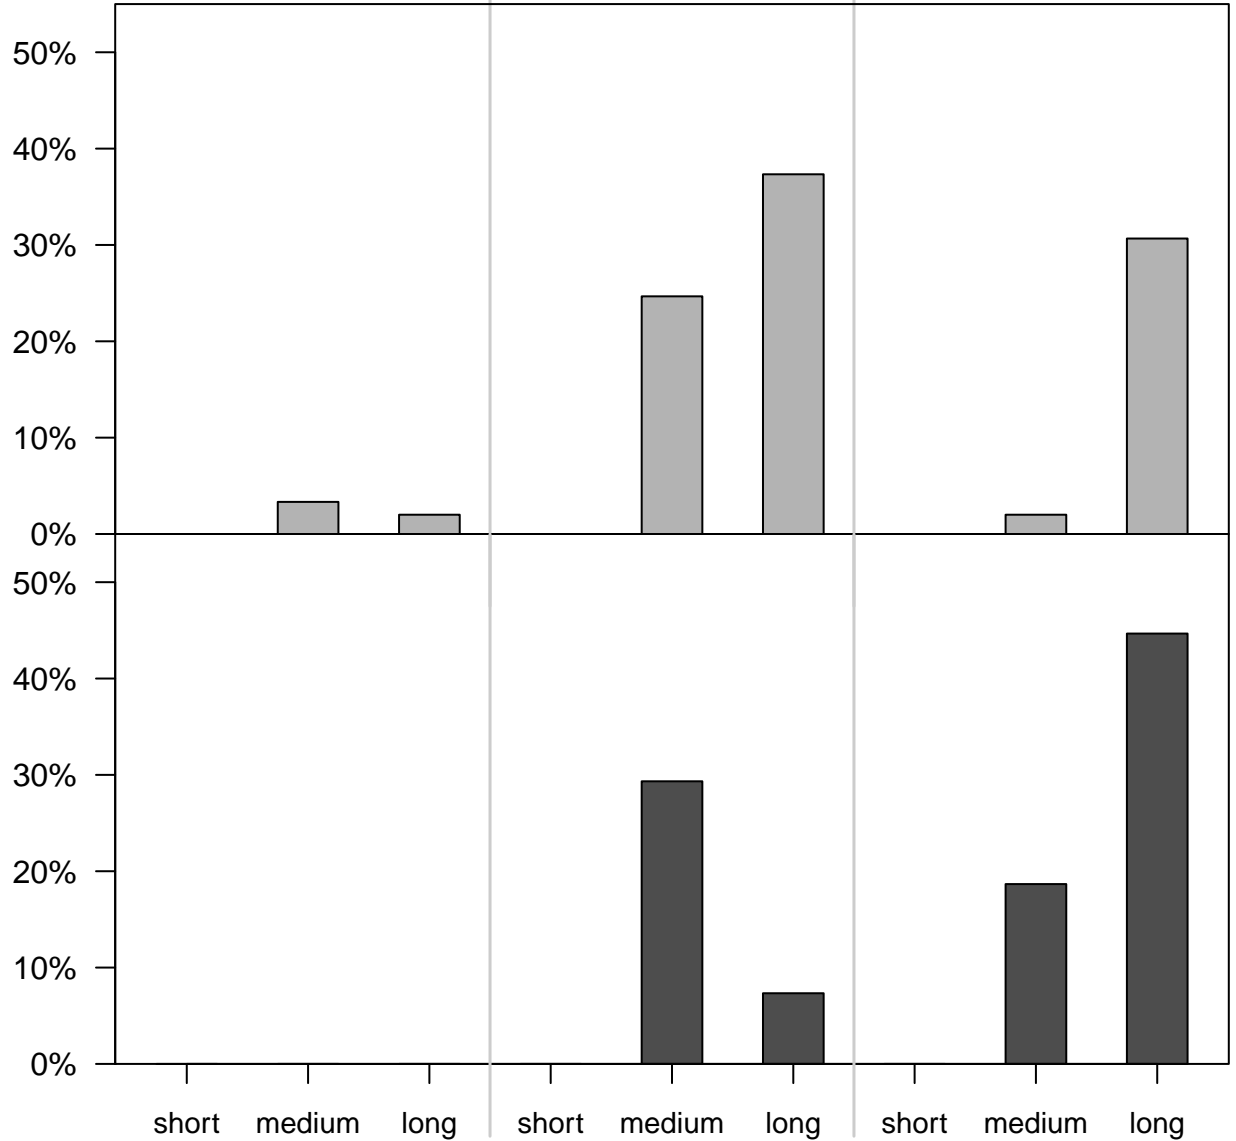

leg length
