# Supplementary material for: Beauty, elegance, grace, and sexiness compared
Source: PLoS One. 2019 Jun 21;14(6):e0218728. doi: 10.1371/journal.pone.0218728 (PMC6588248; doi:10.1371/journal.pone.0218728)
Supplement: S1 Table — (XLSX) [file pone.0218728.s012.xlsx]

## Sheet: S1 Table
S1 Table. Descriptive statistics for gait
English	German	M	SD
upright carriage	aufrecht	6.59	0.69
fluent	fließend	6.32	0.97
light	leicht wirkend	6.06	1.17
dancerly	tänzerisch	4.54	1.6
elastic	federnd	4.19	1.66
hunched	gebückt	1.2	0.53
