# Supplementary material for: Beauty, elegance, grace, and sexiness compared
Source: PLoS One. 2019 Jun 21;14(6):e0218728. doi: 10.1371/journal.pone.0218728 (PMC6588248; doi:10.1371/journal.pone.0218728)
Supplement: S2 Table — (XLSX) [file pone.0218728.s013.xlsx]

## Sheet: S2 Table
S2 Table. Descriptive statistics for person variables
English	German	M	SD
cultured	kultiviert	6.31	1.04
self-confident	selbstbewusst	6.09	1.08
polite	höflich	6.01	1.17
charming	charmant	5.97	1.2
gallant	galant	5.92	1.28
educated	gebildet	5.76	1.1
intelligent	intelligent	5.71	1.09
eloquent	eloquent	5.49	1.38
successful	erfolgreich	5.12	1.49
correct	korrekt	4.89	1.53
conscientious	gewissenhaft	4.71	1.57
responsible	verantwortungsvoll	4.6	1.65
sociable	sozial zugewandt	4.58	1.58
creative	kreativ	4.42	1.46
open	offen	4.41	1.45
rich	reich	4.35	1.78
honest	ehrlich	4.33	1.61
extroverted	extrovertiert	4.28	1.52
witty	witzig	3.98	1.48
emotional	emotional	3.65	1.4
athletic	sportlich	3.61	1.48
caring	fürsorglich	3.56	1.51
introverted	introvertiert	3.16	1.49
