# Supplementary material for: Beauty, elegance, grace, and sexiness compared
Source: PLoS One. 2019 Jun 21;14(6):e0218728. doi: 10.1371/journal.pone.0218728 (PMC6588248; doi:10.1371/journal.pone.0218728)
Supplement: S3 Table — (XLSX) [file pone.0218728.s014.xlsx]

## Sheet: S3 Table
S3 Table. Descriptive statistics for elegant diction
English	German	M	SD
well-spoken	wortgewandt	6.27	0.83
nuanced wording	differenziert in der Wortwahl	6.09	1.04
exquisite vocabulary	erlesen im Wortschatz	6	1.1
meticulously articulated	fein artikuliert	6.11	1.04
rich in vocabulary	reich im Vokabular	6	1.16
poised	souverän	6.17	1
precise in expression	präzis im Ausdruck	5.78	1.27
eloquent	eloquent	5.84	1.27
sophisticated	gehoben	5.44	1.45
correct	korrekt	5.42	1.48
pointed	pointiert	5.37	1.38
rich in imagery	bilderreich	4.85	1.45
playful	spielerisch	4.81	1.61
quick-witted	schlagfertig	5.03	1.46
concise	konzis	4.21	1.33
complicated	kompliziert	3.13	1.5
verbose	weitschweifig	3.12	1.71
stilted	gestelzt	2.36	1.48
long-winded	umständlich	2.24	1.38
monotonous	monoton	1.69	1.02
