# Supplementary material for: Beauty, elegance, grace, and sexiness compared
Source: PLoS One. 2019 Jun 21;14(6):e0218728. doi: 10.1371/journal.pone.0218728 (PMC6588248; doi:10.1371/journal.pone.0218728)
Supplement: S4 Table — (XLSX) [file pone.0218728.s015.xlsx]

## Sheet: S4 Table
S4 Table. Descriptive statistics for elegant objects
English	German	frequency		degree
		M	SD	M	SD
evening wear	Abendgarderobe	5.98	0.96	6.85	0.42
hats	Hüte	5.01	1.48	6.13	1.38
jewelry	Schmuck	4.65	1.18	6.55	0.95
yachts	Yachten	4.2	1.86	5.05	1.95
hairstyles	Frisuren	4.17	1.34	6.1	1.3
garments	Oberbekleidung	4.1	1.16	6.05	1.15
furniture	Möbel	4.03	1.29	5.76	1.51
underwear	Unterwäsche	3.82	1.33	5.36	1.63
cutlery	Besteck	3.75	1.5	5.01	1.76
cars	Autos	3.61	1.45	5.3	1.72
bridges	Brücken	3.38	1.46	4.77	1.97
swimwear	Badebekleidung	2.97	1.26	4.22	1.69
packaging	Verpackungen	2.89	1.1	4.61	1.75
skyscrapers	Hochhäuser	2.72	1.35	4.12	2.07
