# Supplementary material for: Beauty, elegance, grace, and sexiness compared
Source: PLoS One. 2019 Jun 21;14(6):e0218728. doi: 10.1371/journal.pone.0218728 (PMC6588248; doi:10.1371/journal.pone.0218728)
Supplement: S5 Table — (XLSX) [file pone.0218728.s016.xlsx]

## Sheet: S5 Table
S5 Table. Most frequently mentioned elegant persons (celebrities)
	Persons		absolute frequencies	relative frequencies	mean list rank	CSI
Women	Audrey	Hepburn	25	0.167	1.4	0.119
	Angelina	Jolie	26	0.173	1.58	0.11
	Queen	Elizabeth II	17	0.113	1.82	0.062
	Emma	Watson	13	0.087	1.92	0.045
	Kate	Middleton	14	0.093	2.43	0.038
	Cate	Blanchett	8	0.053	1.62	0.033
	Meryl	Streep	8	0.053	2.12	0.025
	Coco	Chanel	8	0.053	2.38	0.023
Men	George	Clooney	39	0.26	1.41	0.184
	James	Bond	15	0.1	1.6	0.063
	Karl	Lagerfeld	13	0.087	1.62	0.054
	Brad	Pitt	9	0.06	1.44	0.042
	Leonardo	DiCaprio	9	0.06	1.78	0.034
	Barack	Obama	9	0.06	2	0.03
