# Supplementary material for: Beauty, elegance, grace, and sexiness compared
Source: PLoS One. 2019 Jun 21;14(6):e0218728. doi: 10.1371/journal.pone.0218728 (PMC6588248; doi:10.1371/journal.pone.0218728)
Supplement: S6 Table — (XLSX) [file pone.0218728.s017.xlsx]

## Sheet: S6_table
	Adjective pair	F1	F2	F3	F4	F5	F6	F7	h2	comp
Tastefulness/ Fluency	pleasant_unpleasant	0.73	-0.08	0.09	0.17	-0.03	-0.11	0.08	0.61	1.2
	harmonious_disharmonious	0.66	0.04	0.06	0.08	0.01	0.02	0.1	0.54	1.1
	fluent_faltering	0.61	0.02	-0.16	0.01	0.24	0.09	0	0.5	1.5
	refined_vulgar	0.53	0.05	0.12	-0.25	0.02	0.21	0.18	0.67	2.2
	tasteful_tasteless	0.52	0.03	0.29	-0.05	0.06	-0.05	0.04	0.52	1.7
	disciplined_undisciplined	0.41	0.06	0.18	-0.26	0.06	0.13	-0.11	0.41	2.7
	precious_worthless	0.36	-0.11	0.31	-0.01	0.03	0.1	0.13	0.4	2.7
	rich_poor	0.31	-0.21	0.05	-0.29	-0.03	0.09	0.2	0.31	3.8
Affective Habitus/ Arousal	simple_baroque	0.14	0.66	0.1	0	0.17	-0.15	-0.08	0.55	1.4
	conspicuous_inconspicuous	0.2	-0.6	-0.12	-0.01	0.04	0.16	0.07	0.43	1.5
	reserved_forceful	-0.17	0.59	-0.01	0.04	0.07	-0.04	0.17	0.4	1.4
	soothing_arousing	0.08	0.56	-0.06	0.1	-0.24	0.24	0.06	0.43	2
	extrovert_introvert	0.04	-0.55	0.01	-0.07	0.17	-0.09	-0.14	0.37	1.4
	discreet_richly.ornamented	0.16	0.53	0.03	-0.03	0.1	-0.26	-0.03	0.4	1.8
	libidinous_inhibited	0.26	-0.49	-0.11	0.25	0.1	-0.09	-0.08	0.4	2.5
	hot_cool	-0.06	-0.46	0.17	0.27	0.13	-0.25	-0.09	0.47	2.9
	quiet_loud	0.22	0.45	-0.07	-0.08	0.08	0.1	0.13	0.37	2
Cultural Sophistication	smart_stupid	-0.04	0.02	0.75	0.05	0.04	0.05	-0.07	0.57	1
	educated_uneducated	-0.05	0.01	0.67	-0.07	0.07	-0.02	0.07	0.46	1.1
	witty_inane	0.18	0.06	0.59	0.05	-0.02	0.01	0	0.47	1.2
	cultured_uncultured	0.36	0.04	0.41	-0.09	0.08	0.12	0.16	0.59	2.7
Intellectual Rigor	multi.colored_monochrome	0.08	-0.29	0.08	0.52	-0.08	-0.01	-0.07	0.4	1.8
	dreamy_sober	-0.02	0.04	-0.05	0.51	0.12	0.16	0.11	0.28	1.5
	indulgent_rigorous	0.06	0.05	-0.06	0.47	-0.05	-0.11	0.11	0.27	1.3
	natural_artificial	0.22	0.23	0.22	0.43	0.09	-0.03	-0.1	0.41	3
	emotional_rational	0.05	-0.12	-0.12	0.4	0.2	-0.07	0.05	0.26	2.1
	verbose_concise	-0.03	0.12	-0.11	0.31	0.03	0.28	-0.18	0.15	3.3
Lightness/ Slenderness	slender_sturdy	-0.03	-0.06	0.19	-0.1	0.56	-0.01	0.05	0.4	1.4
	light_heavy	0.05	0.12	-0.03	0.15	0.54	0.14	0.18	0.46	1.7
	young_old	-0.18	-0.12	0.01	0.18	0.48	-0.07	0.04	0.27	1.8
	skillful_clumsy	0.25	0.03	0.08	-0.1	0.33	0.3	-0.25	0.39	4.1
	svelte_bulky	0.25	0.05	0.17	-0.07	0.3	0.13	0.24	0.49	4.2
	tall_short	0.13	-0.1	0.16	-0.14	0.27	0.07	-0.16	0.22	4.2
Exquisiteness	exceptional_ordinary	-0.05	-0.1	0.19	0.11	0.09	0.55	-0.03	0.35	1.5
	superior_inferior	0.16	-0.14	0.08	-0.22	0.13	0.35	-0.07	0.33	3.2
	exquisite_common	0.2	-0.04	0.29	-0.12	-0.01	0.34	0.02	0.36	3
	down.to.earth_divorced.from.reality	0.27	0.22	0.22	0.14	-0.08	-0.32	-0.28	0.43	5.2
	democratic_elitist	0.05	0.04	0.13	0.28	-0.15	-0.31	-0.11	0.3	3.2
	expensive_cheap	0.02	0.03	0.14	-0.23	0.14	0.29	0.08	0.28	3.2
Delicacy/ Femininity	feminine_masculine	0.03	-0.03	0.06	0	0.03	-0.07	0.64	0.4	1.1
	fragile_robust	0.23	0.2	-0.23	-0.02	0.14	-0.08	0.48	0.47	2.7
	delicate_coarse	0.2	0.15	0.14	0.18	0.12	0.11	0.44	0.48	2.7
