# Supplementary material for: Beauty, elegance, grace, and sexiness compared
Source: PLoS One. 2019 Jun 21;14(6):e0218728. doi: 10.1371/journal.pone.0218728 (PMC6588248; doi:10.1371/journal.pone.0218728)
Supplement: S7 Table — (XLSX) [file pone.0218728.s018.xlsx]

## Sheet: S7_table
	Pillai	F	Numerator df	Denominator df	p	p
						(Bonferroni)
Beauty vs Elegance
(1) Tastefulness/ Fluency	0.277	8.43	8	176	0	0
(2) Affective Habitus/ Arousal	0.13	2.85	9	172	0.004	0.159
(3) Cultural Sophistication	0.087	4.6	4	193	0.001	0.06
(4) Intellectual Rigor	0.254	8.85	6	156	0	0
(5) Lightness/ Slenderness	0.188	7	6	181	0	0
(6) Exquisiteness	0.199	7.38	6	178	0	0
(7) Delicacy/ Femininity	0.021	1.35	3	190	0.261	1
Beauty vs Grace
(1) Tastefulness/ Fluency	0.18	4.55	8	166	0	0.002
(2) Affective Habitus/ Arousal	0.188	4.21	9	163	0	0.003
(3) Cultural Sophistication	0.051	2.5	4	184	0.044	1
(4) Intellectual Rigor	0.14	4.24	6	156	0.001	0.023
(5) Lightness/ Slenderness	0.14	4.71	6	174	0	0.008
(6) Exquisiteness	0.144	4.84	6	172	0	0.006
(7) Delicacy/ Femininity	0.003	0.17	3	181	0.914	1
Beauty vs Sexiness
(1) Tastefulness/ Fluency	0.077	1.75	8	168	0.09	1
(2) Affective Habitus/ Arousal	0.287	7.65	9	171	0	0
(3) Cultural Sophistication	0.017	0.81	4	191	0.522	1
(4) Intellectual Rigor	0.025	0.67	6	154	0.675	1
(5) Lightness/ Slenderness	0.036	1.09	6	173	0.373	1
(6) Exquisiteness	0.019	0.57	6	176	0.751	1
(7) Delicacy/ Femininity	0.199	15.54	3	188	0	0
Elegance vs Grace
(1) Tastefulness/ Fluency	0.07	1.61	8	171	0.124	1
(2) Affective Habitus/ Arousal	0.021	0.4	9	165	0.935	1
(3) Cultural Sophistication	0.011	0.53	4	186	0.717	1
(4) Intellectual Rigor	0.086	2.47	6	157	0.026	1
(5) Lightness/ Slenderness	0.034	1.05	6	180	0.397	1
(6) Exquisiteness	0.032	0.99	6	177	0.433	1
(7) Delicacy/ Femininity	0.016	1.03	3	185	0.381	1
Elegance vs Sexiness
(1) Tastefulness/ Fluency	0.365	12.43	8	173	0	0
(2) Affective Habitus/ Arousal	0.431	14.56	9	173	0	0
(3) Cultural Sophistication	0.128	7.06	4	193	0	0.001
(4) Intellectual Rigor	0.241	8.21	6	155	0	0
(5) Lightness/ Slenderness	0.184	6.71	6	179	0	0
(6) Exquisiteness	0.235	9.28	6	181	0	0
(7) Delicacy/ Femininity	0.292	26.43	3	192	0	0
Grace vs Sexiness
(1) Tastefulness/ Fluency	0.257	7.05	8	163	0	0
(2) Affective Habitus/ Arousal	0.465	15.82	9	164	0	0
(3) Cultural Sophistication	0.09	4.56	4	184	0.002	0.065
(4) Intellectual Rigor	0.182	5.77	6	155	0	0.001
(5) Lightness/ Slenderness	0.177	6.18	6	172	0	0
(6) Exquisiteness	0.163	5.67	6	175	0	0.001
(7) Delicacy/ Femininity	0.175	12.92	3	183	0	0
